# Supplementary material for: Spatially- and temporally-controlled postnatal p53 knockdown cooperates with embryonic Schwann cell precursor Nf1 gene loss to promote malignant peripheral nerve sheath tumor formation
Source: PubMed Central journal article supplement (PMC4884927; doi:10.18632/oncotarget.7232), 2016-02-07
Supplement: oncotarget-07-7403-s001.pdf [file oncotarget-07-7403-s001.pdf]

## Spatially- and temporally-controlled postnatal p53 knockdown cooperates with embryonic Schwann cell precursor *Nf1* gene loss to promote malignant peripheral nerve sheath tumor formation

### Supplementary Material

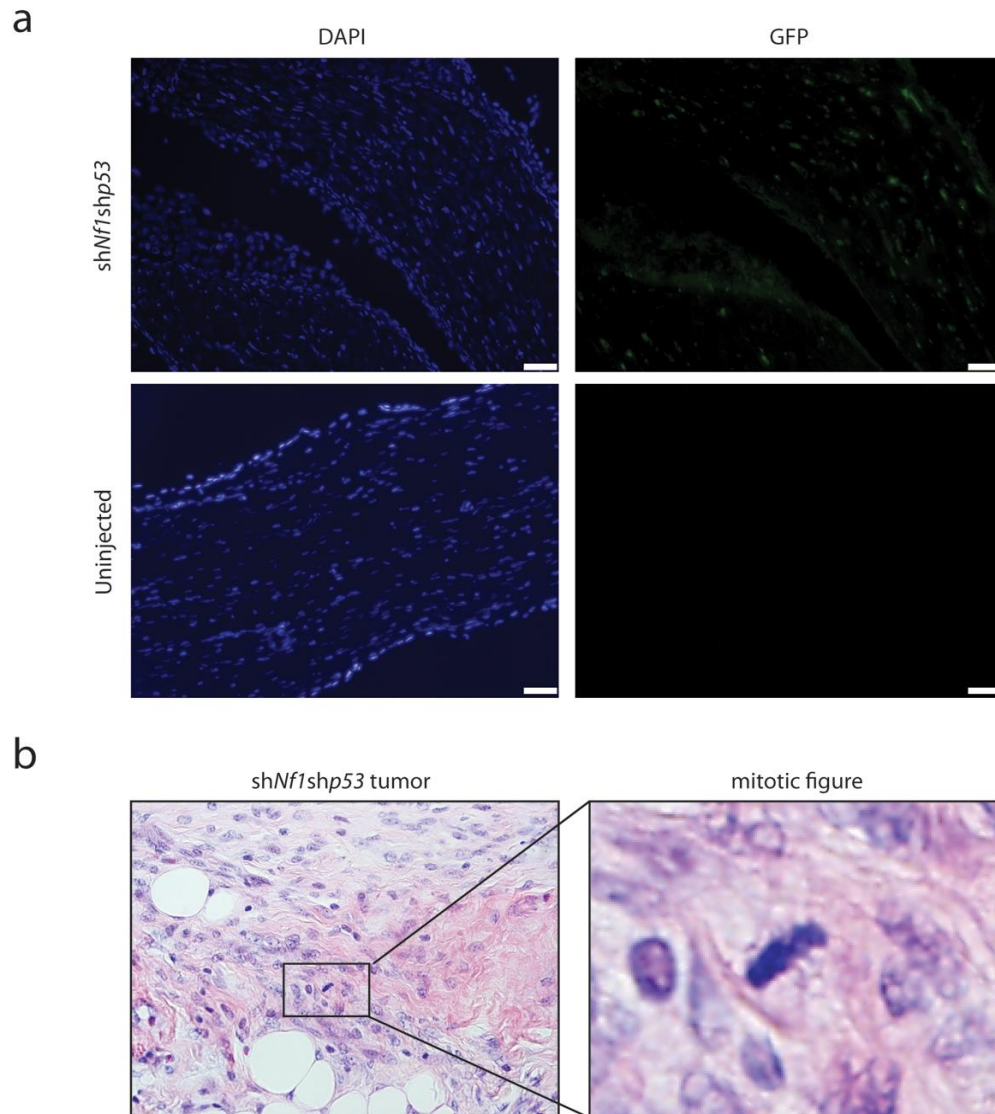

**Supplemental Figure 1.** (a) GFP-positive cells are apparent seven days after the injection of pTomo-sh*Nf1*;shp53 virus into the right sciatic nerve. 50 $\mu$ m scale bar. (b) Representative image of mitotic figures in a MPNST arising in a Periostin-Cre; *Nf1*<sup>flx/flx</sup> mouse following the injection of pTomo-sh*Nf1*;shp53 virus into the right sciatic nerve.

**Supplemental Table 1. Current MPNST murine models**

| Mouse Model                                                                                                                                    | Tumor phenotype                                        | Genetic Background                                                                               | Reference |
|------------------------------------------------------------------------------------------------------------------------------------------------|--------------------------------------------------------|--------------------------------------------------------------------------------------------------|-----------|
| <i>Nf1</i> <sup>+/-null</sup> ; <i>Trp53</i> <sup>+/-null</sup> cis                                                                            | MPNSTs in 30% mice, 5 months                           | 129sv x C57BL/6                                                                                  | [15, 16]  |
| <i>Nf1</i> <sup>flox/flox</sup> ; <i>Ink4aArf</i> <sup>flox/flox</sup> , adenoviral Cre injected into the sciatic nerves                       | MPNSTs in almost all mice by 4-6 months                | <i>Nf1</i> <sup>flox/flox</sup> : 129sv x C57BL/6<br><i>Ink4a</i> <sup>flox/flox</sup> : FVB     | [19]      |
| <i>Nf1</i> <sup>flox/flox</sup> ; <i>Dhh</i> -Cre; Cnp- <i>EGFR</i>                                                                            | MPNSTs in 33% mice, 4-8 months                         | Cnp- <i>EGFR</i> : C57BL/6<br><i>Nf1</i> <sup>flox/flox</sup> ; <i>Dhh</i> -Cre: 129sv x C57BL/6 | [17]      |
| <i>Trp53</i> <sup>R270H</sup> ; Cnp- <i>EGFR</i>                                                                                               | MPNSTs in 18% mice, median 284 days                    | Cnp- <i>EGFR</i> : FVB/N                                                                         | [7]       |
| P <sub>0</sub> -GGFβ3 transgenic                                                                                                               | MPNSTs 70%, 6-10 months                                | backcrossed to C57BL/6J x SJL/J F1                                                               | [43, 45]  |
| P <sub>0</sub> -GGFβ3 inbred<br>P <sub>0</sub> -GGFβ3; <i>Nf1</i> <sup>+/-null</sup><br>P <sub>0</sub> -GGFβ3; <i>Trp53</i> <sup>+/-null</sup> | No tumors<br>No tumors<br>MPNSTs in 95% mice, 226 days | C57BL/6J                                                                                         | [44]      |
| GFAP-Cre; <i>Pten</i> <sup>flox/+</sup> ; LSL- <i>Kras</i> <sup>G12D/+</sup>                                                                   | MPNSTs in 100% mice, 4 months                          | C57BL/6 x 129sv x BALB/c                                                                         | [18]      |
| <i>Nf1</i> <sup>+/-null</sup> ; <i>p19Arf</i> <sup>+/-null</sup>                                                                               | MPNSTs in 10% mice, 36 weeks                           | <i>Nf1</i> <sup>+/-null</sup> : 129sv<br><i>p19Arf</i> <sup>+/-null</sup> : 129svJ6 x C57BL/6    | [20]      |

**Supplemental Table 2. Antibodies used**

| <b>Antibody</b>               | <b>Dilution</b> | <b>Antigen Retrieval</b>      | <b>Secondary Antibody</b> |
|-------------------------------|-----------------|-------------------------------|---------------------------|
| S100 $\beta$ (ab41548; Abcam) | 1:250           | Citrate buffer                | Rabbit                    |
| Ki67 (790-4286; Ventana)      | Pre-diluted     | CC1 buffer (950-124, Ventana) | Rabbit                    |
| Tryptase (760-4276; Ventana)  | Pre-diluted     | CC1 buffer (950-124, Ventana) | Mouse                     |
| Col4A (ab6586; Abcam)         | 1:1000          | Citrate buffer                | Rabbit                    |
